# Supplementary material for: Volumetric absorptive microsampling and dried blood spot microsampling vs. conventional venous sampling for tacrolimus trough concentration monitoring
Source: publisher site journal article supplement (doi:10.1515/cclm-2019-1260), 2020-05-15
Supplement: Supplementary file 1 [file cclm-2019-1260_suppl.docx]

**Supplement 1 – Information on tacrolimus analytical methods**

This supplement gives a brief overview of the most relevant information of the three different analytical LC-MS/MS methods used to measure tacrolimus used in this study. These methods are Volumetric Absoptive Micro Sampling (VAMS), Dried Blood Spots (DBS) and whole blood (WB). Full details on these methods were published earlier.[23, 32-35]

Calibrator and standardization information

For each individual analysis method (VAMS, DBS and WB) calibrator and controls were prepared separately. Control- and calibrator samples were prepared from different stock solutions of certified pure substance tacrolimus (Sigma-Aldrich Inc., St. Louis, USA) for each individual analysis method (VAMS, DBS and WB). To prevent cell lysis, the volume of the spiked stock solutions never exceeded 5% of the total blood volume used for sample preparation. For WB, fresh EDTA WB was obtained from a healthy volunteer as is procedure in our hospital. For DBS and VAMS, citrate whole blood was purchased from Sanquin (Amsterdam, the Netherlands). The hematocrit was adjusted, using a previously described method by adding or removing plasma, to a value of 0.38 (v/v).[32] Information on preparation of calibrators and controls can be found in Table S1.

Imprecision information

VAMS and DBS validation samples were analyzed over a total of 4 runs. Data on imprecision is provided in Table S1 for each individual run. WB samples were analyzed as part of routine clinical care and therefore scattered over a large number of individual runs. Therefore, imprecision data as provided in Table S1 is based on a query within the laboratory system (GLIMS, version 9.811, MIPS, Ghent, Belgium) over the period of time in which the samples were collected and analyzed (June 2018 and October 2018).

Internal standard application

All internal standards (IS) are applied during extraction as part of the extraction solution. Details are provided in Table S1. No correction factors are used.

Traceability of DBS and VAMS samples to higher-order reference materials and methods.

Calibration samples were prepared with the same certified reference material for the VAMS, DBS and WB analytical methods in the laboratory of the department of Clinical Pharmacy and Pharmacology of the University Medical Center Groningen (UMCG). Reference materials were bought from Sigma-Aldrich Inc. (Cerilliant T-049, lot number FN04231802, St. Louis, USA). This gravimetrically prepared reference material is metrological traceable to the SI and higher order standards from the National Institute of Standards and Technology (NIST) through an unbroken chain of comparisons and meets the requirements of ISO 15194, ISO 13485, ISO guide 34, ISO/IEC 17025, ISO 9001 and GMP/GLP. Its certified concentration ± associated uncertainty is 1.000 ± 0.006 mg/mL. The mass balance purity factor is 97.52%, an expanded uncertainty for the mass balance purity factor was not reported in the certificate of analysis.

Traceability of DBS and VAMS samples to the WB sample

Since WB samples were obtained as part of routine patient care, they were processed following the regular workflow of sampling, sample transport and analysis in the University Medical Center Groningen. This workflow is warranted by ISO 15189:2012 accreditation. Details are provided below.

The DBS and VAMS samples were obtained through a fingerprick by the same phlebotomist following written instructions available at time of sampling. Sampling took place at the phlebotomists center in the UMCG. First, the WB sample was obtained via vena puncture. Afterwards, a fingerpick was performed, and a DBS sample was obtained by letting 2 drops of blood fall freely on a Whatmann DMPK-C cards (GE Healthcare, Chicago, IL, USA) following a previously described method.[27] From the same fingerpick, two 20 µL VAMS tips (Mitra®, Neoteryx) were filled according to the manufacturer’s instructions. On both the DBS and VAMS sample, the patients’ name, unique UMCG patient number, date of birth, sampling date and sampling time were written by the phlebotomist. WB samples are barcoded using barcode stickers containing the patients’ name, unique UMCG patient number, date of birth, unique sample number and type of analysis to be carried out. Samples were allowed to dry for 30 minutes at the phlebotomists center before internal transport to the laboratory.

After drying, the samples were packed in a plastic seal bag and transported to the laboratory via a pneumatic tube system. After receiving the DBS and VAMS samples, the plastic seal bag was removed directly. The samples were inspected independently by two experienced lab technicians for quality, based on predefined criteria described earlier.[15,27,30,31] If the judgment of the technicians differed, consensus was obtained by discussing each other’s judgment. The DBS and VAMS samples were dried for at least 24 hours at room temperature and packed in sealed plastic bags with a desiccant. The samples were stored at -20°C until analysis was performed. Stability of tacrolimus in DBS samples was validated for 29 weeks and in VAMS samples for 50 days at -20°C, so analysis occurred within these timeframes, respectively.[23,32,33]

Table S1: Information on the three different analytical methods to measure tacrolimus

|  | VAMS | DBS | WB |
| --- | --- | --- | --- |
| Control and calibrator sample preparation | - prepare stock solution by weighing tacrolimus pure substance followed by the addition of an accurate amount of methanol  - add stock solution to citrate WB  - roller mixer 30 min  - sample with 20 µL Mitra© VAMS tips - drying 24h at room temperature  - store in −20®C | - prepare stock solution by weighing tacrolimus pure substance followed by the addition of an accurate amount of methanol  - add stock solution to citrate WB  - roller mixer 30 min  - pipet 50 µL on Whatman DMPK-C DBS card  - drying 24h at room temperature  - store in −20®C | - prepare stock solution by weighing tacrolimus pure substance followed by the addition of an accurate amount of methanol  - add stock solution to EDTA WB  - homogenize and aliquot in day to day portions  - store in −20®C |
| Control sample concentration | 10 µg/L | 10 µg/L | 10 µg/L |
| Calibrator sample concentration | 1 µg/L  50 µg/L | 1 µg/L  50 µg/L | 40 µg/L |
| Imprecision (CV%)  Run 1  Run 2  Run 3  Run 4 | -4.2% -7.8% -5.3% -6.0% | -7.0% -9.3% -12.1% -7.3% | -6.7% (between June 2018 and October 2018) |
| Internal standard (IS) | Tacrolimus [13C2H4] | Tacrolimus [13C2H4] | Ascomycin |
| Sample preparation | - VAMS tips placed in Eppendorf cup - 100 µL extraction solution (40:60 v/v) methanol:water containing 2.5 µg/L IS  - sonicate 47 kHz 30 min  - add 200 µL methanol - 15 min vortex medium speed - 1 min vortex max speed - sonicate 47 kHz 15 min  - 15 min vortex medium speed - 1 min vortex max speed  - centrifuge 10K RPM 5 min  - Transfer into 200 µL glass insert  - −20®C for 10 min - centrifuge 10K RPM 5 min - Inject 20 µL in LC-MS/MS | - Punch 8 mm in Eppendorf cup - add 200 µL extraction solution (80:20 v/v) methanol:water containing 2.5 µg/L IS - vortex 1 min - sonicate 47 kHz 15 min - vortex 1 min - Transfer into 200 µL glass insert - −20®C for 10 min - centrifuge 11K RPM 5 min - Inject 20 µL in LC-MS/MS | - 200 µL EDTA WB - add 500 µL methanol containing 100 µg/L IS  - add 25 µL 2.4M zinc sulfate heptahydrate in UP water - vortex 1 min - −20®C for 10 min - vortex 1 min - centrifuge 11K RPM 5 min - Inject 10 µL in LC-MS/MS |
